# Supplementary material for: Peak Occurrence of Retinal Detachment following Cataract Surgery: A Systematic Review and Pooled Analysis with Internal Validation
Source: J Ophthalmol. 2018 Nov 22;2018:9206418. doi: 10.1155/2018/9206418 (PMC6282121; doi:10.1155/2018/9206418)
Supplement: Supplementary Materials — Supplemental Table 1: studies included in the analysis. Supplemental Figure 1: flow diagram of the inclusion process. Supplemental Figure 2: relationship between age of patients which developed RD and time to RD. [file 9206418.f1.zip]

Archive with 3 entries (3 files):
- 9206418.f1/Supplemental Figure 1 I.H_6.7_JOPH_2525913.docx
- 9206418.f1/Supplemental Figure 2_JOPH_2525914.tif
- 9206418.f1/Supplemental Table 1_JOPH_2525912.docx
